# Supplementary material for: Detection of AR-V7 in Liquid Biopsies of Castrate Resistant Prostate Cancer Patients: A Comparison of AR-V7 Analysis in Circulating Tumor Cells, Circulating Tumor RNA and Exosomes
Source: PubMed Central journal article supplement (PMC6678978; doi:10.3390/cells8070688), 2019-07-08
Supplement: cells-08-00688-s001.pdf [file cells-08-00688-s001.pdf]

PATIENTS:

| Basic information |     | Metastasis                 |                                       |                    | Primary treatment |                  | Past systemic therapy |                       | Noval therapy     |                | CTC           |              | ctRNA      |           |          | Exosome |          |        |       |         |       |       |
|-------------------|-----|----------------------------|---------------------------------------|--------------------|-------------------|------------------|-----------------------|-----------------------|-------------------|----------------|---------------|--------------|------------|-----------|----------|---------|----------|--------|-------|---------|-------|-------|
| Patient           | Age | Hormone sensitivity status | Gleason score (High : ≥7 and Low: <7) | Metastatic disease | Bone metastases   | Lymph metastases | Visceral metastases   | Radical Prostatectomy | Radiation therapy | ADT (month on) | Chemo-therapy | Enzalutamide | Abiaterone | CTC count | AR-FL    | AR-V7   | GAPDH    | AR-FL  | AR-V7 | GAPDH   | AR-FL | AR-V7 |
| 1                 | 65  | HSPC                       | High                                  | Yes                | Yes               | No               | No                    | Yes                   | Yes               | No             | No            | No           | No         | 115       | 0        | 0       | 13212    | 6.23   | 0     | 2747    | 0     | 0     |
| 2                 | 87  | HSPC                       | High                                  | Yes                | Yes               | No               | No                    | No                    | No                | Yes (6)        | No            | No           | No         | 56        | 0        | 0       | 21818    | 15.24  | 0     | -       | -     | -     |
| 3                 | 80  | HSPC                       | High                                  | Yes                | No                | Yes              | Yes                   | No                    | Yes               | Yes (5)        | No            | No           | No         | 29        | 0        | 0       | 11111    | 0      | 0     | -       | -     | -     |
| 4                 | 71  | HSPC                       | N/A                                   | Yes                | Yes               | No               | Yes                   | No                    | No                | Yes (N/A)      | No            | No           | No         | 27        | 0.36     | 0       | 13576    | 12.47  | 0     | 1899    | 0     | 0     |
| 5                 | 85  | HSPC                       | High                                  | Yes                | No                | No               | Yes                   | No                    | No                | Yes (6)        | No            | No           | No         | 24        | 0.35     | 0       | 9790     | 0      | 0     | 3394    | 31.86 | 0     |
| 6                 | 68  | HSPC                       | High                                  | No                 | No                | No               | No                    | No                    | Yes               | Yes (24)       | No            | No           | No         | 17        | 0        | 3.74    | 15272.73 | 13.16  | 0     | 824     | 0     | 0     |
| 7                 | 86  | HSPC                       | High                                  | Yes                | Yes               | Yes              | No                    | Yes                   | No                | Yes (60)       | No            | No           | No         | 12        | 0        | 3.64    | 9697     | 0      | 3.46  | 5939    | 0     | 0     |
| 8                 | 62  | HSPC                       | High                                  | Yes                | Yes               | Yes              | No                    | No                    | No                | Yes (N/A)      | Yes           | No           | No         | 7         | 0        | 1.66    | 28970    | 15.24  | 0     | -       | -     | -     |
| 9                 | 72  | HSPC                       | High                                  | No                 | No                | No               | No                    | Yes                   | No                | No             | No            | No           | No         | 7         | 0        | 0       | 14545    | 9.28   | 0     | -       | -     | -     |
| 10                | 86  | HSPC                       | N/A                                   | Yes                | Yes               | Yes              | No                    | No                    | No                | Yes (12)       | No            | No           | No         | 7         | 0        | 0       | 6751     | 3.46   | 0     | 2618    | 23.55 | 0     |
| 11                | 78  | HSPC                       | High                                  | Yes                | Yes               | No               | No                    | No                    | No                | Yes (6)        | No            | No           | No         | 7         | 0        | 0       | 9256     | 5.67   | 0     | 2254    | 0     | 0     |
| 12                | 72  | HSPC                       | High                                  | Yes                | Yes               | No               | No                    | Yes                   | No                | Yes (24)       | Yes           | No           | No         | 3         | 0        | 2.29    | 20606    | 0      | 0     | -       | -     | -     |
| 13                | 80  | CRPC                       | High                                  | Yes                | Yes               | Yes              | Yes                   | No                    | Yes               | Yes            | No            | Yes          | No         | 184       | 1.56     | 0       | 13731    | 8.31   | 0     | -       | -     | -     |
| 14                | 65  | CRPC                       | High                                  | Yes                | Yes               | No               | No                    | No                    | No                | Yes            | Yes           | No           | No         | 82        | 1.81     | 0       | 18874    | 7.92   | 3.96  | -       | -     | -     |
| 15                | 71  | CRPC                       | High                                  | Yes                | Yes               | Yes              | No                    | Yes                   | Yes               | Yes            | No            | No           | No         | 75        | 153.77   | 6.25    | 26886    | 114.95 | 0     | -       | -     | -     |
| 16                | 84  | CRPC                       | High                                  | Yes                | Yes               | No               | Yes                   | No                    | No                | Yes            | Yes           | No           | No         | 70        | 68.57    | 1.56    | 14269    | 0      | 0     | 994     | 0     | 0     |
| 17                | 90  | CRPC                       | High                                  | Yes                | Yes               | Yes              | No                    | No                    | No                | Yes            | Yes           | Yes          | Yes        | 56        | 6701.3   | 146.49  | 28085    | 163.87 | 0     | -       | -     | -     |
| 18                | 74  | CRPC                       | High                                  | Yes                | Yes               | Yes              | No                    | No                    | Yes               | Yes            | Yes           | Yes          | No         | 47        | 89.35    | 0.73    | 21125    | 40.57  | 0     | 3442    | 72.03 | 9.7   |
| 19                | 94  | CRPC                       | Low                                   | Yes                | Yes               | No               | No                    | No                    | No                | Yes            | No            | No           | No         | 39        | 319      | 2.3     | N/A      | 89.16  | 3.78  | -       | -     | -     |
| 20                | 77  | CRPC                       | High                                  | Yes                | Yes               | Yes              | Yes                   | No                    | Yes               | Yes            | No            | Yes          | No         | 35        | 8.21     | 0       | 12764    | 22.05  | 0     | 4896.97 | 0     | 0     |
| 21                | 93  | CRPC                       | High                                  | Yes                | Yes               | Yes              | No                    | No                    | No                | Yes            | No            | No           | No         | 28        | 32.21    | 0       | 18662    | 18.82  | 0     | -       | -     | -     |
| 22                | 70  | CRPC                       | High                                  | Yes                | No                | Yes              | Yes                   | Yes                   | No                | Yes            | Yes           | Yes          | No         | 27        | 90.39    | 71.69   | 29333    | 21.47  | 0     | -       | -     | -     |
| 23                | 66  | CRPC                       | N/A                                   | Yes                | Yes               | Yes              | No                    | Yes                   | No                | Yes            | Yes           | Yes          | No         | 15        | 6.23     | 6.23    | 16234    | 9.65   | 0     | -       | -     | -     |
| 24                | 87  | CRPC                       | High                                  | Yes                | Yes               | No               | Yes                   | No                    | No                | Yes            | No            | No           | No         | 14        | 0        | 0       | 5610     | 0      | 0     | 2109    | 12.47 | 0     |
| 25                | 88  | CRPC                       | N/A                                   | Yes                | Yes               | Yes              | No                    | No                    | No                | Yes            | No            | Yes          | No         | 13        | 0.36     | 0       | 13175    | 13.99  | 0     | -       | -     | -     |
| 26                | 82  | CRPC                       | Low                                   | Yes                | Yes               | No               | No                    | Yes                   | No                | Yes            | No            | No           | No         | 13        | 0        | 0       | 7861     | 0      | 0     | -       | -     | -     |
| 27                | 68  | CRPC                       | High                                  | Yes                | No                | Yes              | No                    | No                    | No                | Yes            | No            | No           | No         | 12        | 13714.29 | 78.96   | 7273     | 22.46  | 0     | -       | -     | -     |
| 28                | 70  | CRPC                       | High                                  | Yes                | Yes               | Yes              | No                    | Yes                   | No                | Yes            | Yes           | Yes          | Yes        | 12        | 103.27   | 2.6     | 120606   | 180.09 | 0     | 5704.1  | 0     | 0     |
| 29                | 80  | CRPC                       | High                                  | Yes                | Yes               | Yes              | Yes                   | No                    | No                | Yes            | Yes           | Yes          | No         | 12        | 136.1    | 6.18    | 13697    | 96.97  | 3.46  | -       | -     | -     |
| 30                | 69  | CRPC                       | N/A                                   | Yes                | Yes               | Yes              | Yes                   | No                    | No                | Yes            | No            | No           | Yes        | 10        | 0        | 0       | 2920     | 0      | 0     | -       | -     | -     |
| 31                | 72  | CRPC                       | N/A                                   | Yes                | Yes               | Yes              | Yes                   | No                    | No                | Yes            | Yes           | Yes          | No         | 9         | 0        | 2.91    | 15030    | 10.39  | 0     | -       | -     | -     |
| 32                | 55  | CRPC                       | Low                                   | Yes                | Yes               | No               | No                    | No                    | Yes               | Yes            | Yes           | No           | Yes        | 8         | 3.74     | 0       | 18424    | 21.47  | 0     | 4872.73 | 0     | 0     |
| 33                | 75  | CRPC                       | High                                  | Yes                | Yes               | Yes              | Yes                   | No                    | No                | Yes            | Yes           | Yes          | No         | 7         | 0        | 1.45    | 13175    | 12.8   | 8.28  | -       | -     | -     |
| 34                | 64  | CRPC                       | High                                  | Yes                | No                | No               | Yes                   | Yes                   | No                | Yes            | No            | No           | No         | 7         | 0        | 0       | 6982     | 0      | 0     | -       | -     | -     |
| 35                | 75  | CRPC                       | High                                  | Yes                | Yes               | No               | No                    | No                    | No                | Yes            | Yes           | Yes          | Yes        | 6         | 22.86    | 0       | 16959    | 0      | 0     | -       | -     | -     |
| 36                | 73  | CRPC                       | High                                  | No                 | No                | No               | No                    | No                    | No                | Yes            | No            | No           | No         | 6         | 0.73     | 0       | 8606     | 4.16   | 0     | 3182    | 0     | 0     |
| 37                | 94  | CRPC                       | High                                  | Yes                | Yes               | No               | No                    | No                    | Yes               | Yes            | No            | No           | Yes        | 5         | 2.08     | 2.08    | 22909    | 25.63  | 0     | -       | -     | -     |
| 38                | 72  | CRPC                       | Low                                   | Yes                | Yes               | No               | No                    | No                    | Yes               | Yes            | Yes           | Yes          | No         | 5         | 0        | 4.47    | 7983     | 0      | 0     | 4169    | 11.08 | 0     |
| 39                | 65  | CRPC                       | High                                  | Yes                | Yes               | No               | No                    | Yes                   | No                | Yes            | Yes           | Yes          | Yes        | 4         | 0        | 0.94    | 12242    | 25.63  | 0     | 1891    | 13.85 | 13.85 |
| 40                | 88  | CRPC                       | High                                  | Yes                | Yes               | No               | No                    | No                    | No                | Yes            | No            | No           | No         | 4         | 0        | 0.94    | 11582    | 3.85   | 0     | -       | -     | -     |
| 41                | 83  | CRPC                       | High                                  | Yes                | Yes               | Yes              | No                    | No                    | Yes               | Yes            | No            | No           | No         | 3         | 0.57     | 0       | 13036    | 0      | 3.92  | -       | -     | -     |
| 42                | 70  | CRPC                       | High                                  | Yes                | No                | Yes              | No                    | Yes                   | No                | Yes            | No            | No           | No         | 2         | 0        | 0       | 7115     | 8.13   | 3.61  | -       | -     | -     |
| 43                | 90  | CRPC                       | High                                  | Yes                | Yes               | Yes              | No                    | No                    | No                | Yes            | No            | No           | Yes        | 2         | 0        | 5.61    | 6061     | 7.58   | 0     | -       | -     | -     |
| 44                | 82  | CRPC                       | High                                  | Yes                | Yes               | No               | No                    | No                    | Yes               | Yes            | Yes           | No           | Yes        | 0         | 0        | 0       | 6949     | 0      | 0     | -       | -     | -     |

N/A: not available

AR-FL and AR-V7 for CTCs as copies/ml blood d AR-V7 for ctRNA and exosomes as copies/ml plasma

**Healthy controls**

|     | ctRNA |       | Exosomal RNA |       |
|-----|-------|-------|--------------|-------|
|     | AR-FL | AR-V7 | AR-FL        | AR-V7 |
| HC1 | 21.47 | 0     | 63.72        | 0     |
| HC2 | 19.39 | 0     | 44.33        | 11.08 |
| HC3 | 9.6   | 0     | 0            | 0     |
| HC4 | 10.67 | 0     | 12.47        | 0     |
| HC5 | 9.6   | 0     | 0            | 0     |

**AR or AR-V7 correlation with CRPC/HSPC status**

|                     | CTC RNA |         |         |         |
|---------------------|---------|---------|---------|---------|
|                     | AR-FL + | AR-FL - | AR-V7 + | AR-V7 - |
| CRPC                | 20      | 12      | 17      | 15      |
| HSPC                | 2       | 10      | 4       | 8       |
| Fisher's exact test | p=0.02  |         | p=0.32  |         |

|                     | ct RNA  |         |         |         |
|---------------------|---------|---------|---------|---------|
|                     | AR-FL + | AR-FL - | AR-V7 + | AR-V7 - |
| CRPC                | 23      | 9       | 6       | 26      |
| HSPC                | 8       | 4       | 1       | 11      |
| Fisher's exact test | p=0.73  |         | p=0.65  |         |
